# Supplementary material
Source: publisher site journal article supplement (https://www.dovepress.com/article/291025)
Supplement: Supplementary file 1 [file get_supplementary_file.php]

**Supplementary material: Questionnaire**

**Assessment of knowledge and practice of medicine storage and disposal among medical and dental students at Lalitpur, Nepal.**

**Section-1: Demographics**

| Age:  Gender:  Year of study:…………….  Program: MBBS………BDS………………  Staying at Hostel…………..Staying with Family………….  Stream: Self-finance……..Scholarship……….  Any first degree relative (father, mother, brother, sister) from medical field? Yes.. No..  If you are staying with your family does your family include a child below 2 years? Yes….No…  Have you used any allopathic medicines during the past 6 months?  Yes…No |
| --- |

**Section-2: Knowledge about unused and expired medicine storage and disposal**

| 1. ‘Expiry date of medicine’ means: 2. The date on which the medicine loses 50% of its potency 3. **The date after which medicine should no longer be used** 4. The date after which medicines can be used for a maximum of 30 days 5. The date at which a medicine was manufactured |
| --- |
| 1. The term ‘Medicine disposal system’ refers to: 2. Returning back unused medicines to the Pharmacy and collecting the bill amount paid 3. **Proper technique for medicine waste management that causes no harm to environment** 4. Removal of medicine from their original container 5. Removing identification of the medicine by removing labels |
| 1. The term ‘Medicine take back system’ for the expired medicines is: 2. Preserving unused medicines for future needs 3. Purchasing medicine from the pharmacy 4. **Depositing expired medicine at the pharmacies** 5. Claiming of medicine cost from insurance companies |
| 1. Inappropriate disposal of medicines in an unauthorized manner can cause: 2. Harmful effects in the environment 3. Accidental poisoning to children 4. Can lead to medicine abuse by vulnerable people 5. **All of the above** |
| 1. The best method for preventing the hazardous effect of unused medicines can be: 2. Consumer guidance on safe disposal of medicines 3. **Returning medicines back to pharmacy before expiry date** 4. Donating the unused medicines to family and friends 5. Burying unused medicines in landfills and/or in the house backyard |
| 1. The best strategy for preventing the hazardous effect of expired medicines can be: 2. Throwing medicine in the garbage 3. **Prescribing appropriate quantities and duration** 4. Donating the unused medicines to family members 5. Donating the unused medicines to charitable organizations |
| 1. Who will be responsible for improving the knowledge among households about proper disposal of ‘Unused medicines’? 2. Doctor 3. Pharmacist 4. Newspaper 5. Social media 6. **All the sources mentioned above** |
| 1. The responsible person (s) for improving the knowledge among households about proper disposal of ‘Expired medicines’ is (are) : 2. Doctor 3. Healthcare professionals 4. Nurses 5. Social media 6. **All the sources mentioned above** |
| 1. Medicines should be stored in 2. Kitchen cabinet 3. Bathroom cabinet 4. Pooja room 5. **Cool and dry place** 6. Freezer of the refrigerator |
| 1. Storing excess medicines at home/hostel may promote:   a. Self- medication.  b. Accidental poisoning  c. Suicidal attempts  d. **All of the above** |
| 1. Appropriate way (s) of discarding expired medicines at home is (are):   a. **Flushing in house sink**  b. Throwing in nearby waterbody such as canal  c. Giving to cleaning personnel  d. Burning the medicines |

**Section-3: Disposal practice of unused and expired medicines**

| 1. How often do you check the expiry date of medicines? 2. Always 3. Often 4. Sometimes 5. Rarely 6. Does not apply (provide reason) 7. What do you do with any quantity of purchased medicine remaining unused at your home/hostel? 8. Throw away in household garbage 9. Flush unused medications in toilet 10. Keep at home until it gets expired 11. Burn them along with garbage 12. Return it to Pharmacy shop   14. How often do you take you medications as per Doctor’s/ Pharmacist’s advice.  a. Always  b. Often  c. Sometimes  d. Rarely  e. Does not apply (provide reason)  15. When multiple medications are prescribed to me/my family members, I/we only use some of them.  a. Always  b. Often  c. Sometimes  d. Rarely  e. Never  16. How often do you practice self-medication for minor illness like fever and headache.  a. Always  b. Often  c. Sometimes  d. Rarely  e. Never  17. How often you buy medicines requiring a valid prescription over-the -counter (OTC)?  a. Always  b. Often  c. Sometimes  d. Rarely  e. Never  18. Expiry dates are very clear and readable in the medicine dosage forms.  a. Yes  b. No  c. Don’t know    19. The following reason/s prevent or limit the use of my/my family member’s medications:  a. Forgetfulness  b. Medication ineffectiveness  c. Medications adverse effects  d. Improvement of health condition    20. Have you ever educated your friends/family members about safe medicine disposal?  a. Yes  b. No  21. Please give any other comments you have about unused medications in homes/hostels.  ……………………………………………………………….. |
| --- |
